# The American Journal of Psychiatry

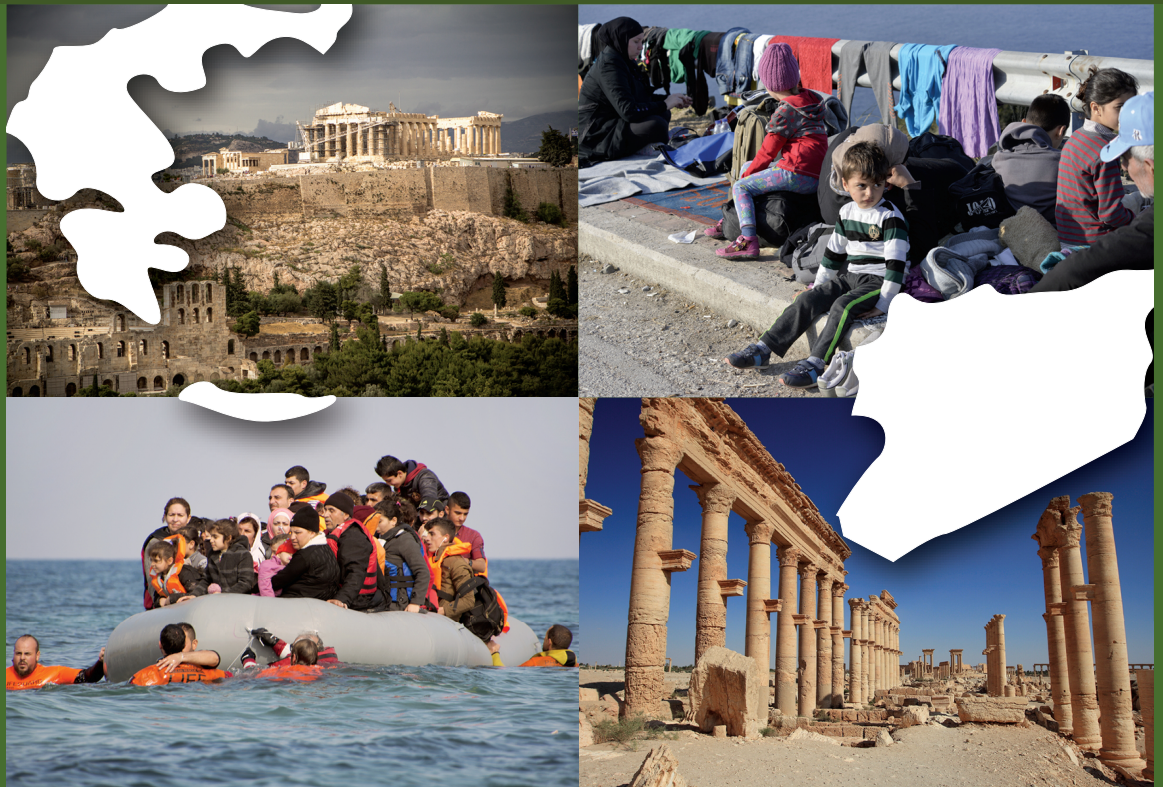

A Compounding Mental Health Crisis: Reflections From the  
Greek Experience With Syrian Refugees

Using Neuroscience to Help Understand Fear and Anxiety:  
A Two-System Framework

Suicide Attempt as a Risk Factor for Completed Suicide:  
Even More Lethal Than We Knew

A Brief Clinical Tool to Estimate Individual Patients' Risk of  
Depressive Relapse Following Remission: Proof of Concept
